1 **Thermal acclimation to warmer temperatures can protect host**  
2 **populations from both further heat stress and the potential invasion of**  
3 **pathogens**

4 Tobias E. Hector<sup>1,3,\*</sup>, Marta S. Shocket<sup>2</sup>, Carla M. Sgrò<sup>1</sup> & Matthew D. Hall<sup>1</sup>

5 <sup>1</sup>School of Biological Sciences, Monash University, Melbourne, Victoria 3800, Australia

6 <sup>2</sup>Department of Ecology and Evolutionary Biology, University of California, Los Angeles, CA, USA

7 <sup>3</sup>Corresponding author: [tobias.hector@zoo.ox.ac.uk](mailto:tobias.hector@zoo.ox.ac.uk)

8 \*Current address: Department of Zoology, University of Oxford, Oxford, United Kingdom

## 9 Abstract

10 Phenotypic plasticity in response to shifts in temperature, known as thermal acclimation, is an  
 11 essential component of the ability of a species to cope with environmental change. Not only does  
 12 this process potentially improve an individual's thermal tolerance, it will also act simultaneously  
 13 on various fitness related traits that determine whether a population increases or decreases in  
 14 size. In light of global change, thermal acclimation therefore has consequences for population  
 15 persistence that extend beyond simply coping with heat stress. This particularly important when  
 16 we consider the additional threat of parasitism associated with global change, as the ability of a  
 17 pathogen to invade a host population depends on both its capacity to proliferate within a host and  
 18 spread between hosts, and thus the supply of new susceptible hosts in a population. Here, we use  
 19 the host *Daphnia magna* and its bacterial pathogen *Pasteuria ramosa* to investigate how thermal  
 20 acclimation may impact various aspects of host and pathogen performance at the scale of both an  
 21 individual and the population. We independently test the effect of maternal thermal acclimation  
 22 and direct thermal acclimation on host thermal tolerance, measured as knockdown times, as well  
 23 as host fecundity and lifespan, and pathogen infection success and spore production. We find that  
 24 direct thermal acclimation enhances host thermal tolerance and intrinsic rates of population  
 25 growth, despite a decline observed for host fecundity and lifespan. Pathogens, on the other hand,  
 26 fared consistently worse at warmer temperatures at the within-host scale, and also in their  
 27 potential to invade a host population. Our results suggest that hosts could benefit more from  
 28 warming than their pathogens, but highlight that considering both within- and between-host  
 29 thermal performance, including thermal tolerance and fitness traits, is needed to fully appreciate  
 30 how increasing thermal variability will impact host and pathogen populations.

31

## Introduction

Processes at every level of biological organisation are fundamentally shaped by temperature, from the rate at which physiological process occur within the body, to the growth and persistence of a population or community (Angilletta 2009; Chown et al. 2010; Somero 2010; Colinet et al. 2015; Sinclair et al. 2016; Vázquez et al. 2017). This is particularly true for host-pathogen interactions. A host or pathogen's response to changing temperatures depends both on metrics of individual performance such as host fecundity, lifespan, and pathogen proliferation, as well as population level processes such as host population growth rate or the capacity of a pathogen to spread between hosts (Anderson and May 1986; Mideo et al. 2008; Hall and Mideo 2018). Yet, studies often only look at snapshots of these traits, or focus on the individual scale (but see Cuco et al. 2018; Agha et al. 2018; Shocket et al. 2018a; 2019), such as how temperature impacts host fecundity or survival, or how temperature alters pathogen proliferation or virulence (Elliot et al. 2002; Mitchell et al. 2005; Laine 2007; Vale et al. 2008; Vale and Little 2009; Hector et al. 2019). Viewing each component in isolation has the potential to be misleading. While population level processes intrinsically depend on individual responses to temperature, one does not necessarily predict the other (Mideo et al. 2008; Wolinska and King 2009; Penczykowski et al. 2016; Hall and Mideo 2018).

For a host, exposure to rising non-lethal temperatures, through the process of acclimation, allows individuals to shift their thermal optima or maxima, potentially acting as a buffer against future thermal stress (Sinclair et al. 2016; Sgrò et al. 2016; Rohr et al. 2018). However, thermal acclimation to warmer temperatures will also typically accelerate the pace of life, leading to earlier reproductive output and shortened lifespans (Zwaan et al. 1992; Angilletta et al. 2004; Stoks et al. 2014), which potentially changes patterns of population growth. Similar processes are also likely to occur for a pathogen. Exposure to higher temperatures can increase the rates at which pathogen can encounter and infect a host (Shocket et al. 2018a,b), but will also accelerate the infection process, by increasing pathogen replication rates while at the same time increasing the virulence of a pathogen and shortening the duration of infection (Mitchell et al. 2005; Fels and Kaltz 2006; Vale et al. 2008; Cuco et al. 2018). It is now clear that pathogen exposure can also severely reduce a host's capacity to cope with thermal stress (Greenspan et al. 2017; Hector et al. 2019), meaning that population persistence will not only depend on a host's thermal performance in isolation, but also on the simultaneous impact of disease exposure (Gehman et al. 2018; Hector et al. 2019; 2020).

The response of hosts and pathogens to increasing temperatures will depend on a balance between the effects of thermal acclimation on their thermal tolerance and thermal performance, versus effects on traits that underlie whether a host or pathogen population will increase or decrease as temperatures change. When assessing the benefits or costs of thermal acclimation, therefore, the potential duality of host and pathogen performance at the individual and population levels needs to be considered. This can be achieved by comparing changes in thermal tolerances with host and pathogen vital metrics. For hosts, life tables can be used to calculate population growth and death rates in order to evaluate how temperature exposure may influence host population dynamics (McCallum 2000; Civitello et al. 2013; Shocket et al. 2018a). In turn for a pathogen, estimates of infection success and proliferation can be integrated via an epidemiological model into the basic reproduction number,  $R_0$ , which captures the potential of a pathogen to spread through a completely susceptible host population (Anderson and May 1986). Rarely, however, has the impact of thermal acclimation on thermal stress resistance been considered in unison with metrics of how well a host or pathogen population might perform (Klockmann et al. 2017; Cavieres et al. 2020). Evidence for whether thermal acclimation improves or impairs thermal stress resistance when a host is simultaneously exposed to disease is likewise limited (see Greenspan et al. 2017).

Thermal acclimation is also not restricted to the direct effects of temperature on a host or pathogen during infection. There is now growing evidence that both trans-generational and developmental temperature exposure can lead to shifts in both thermal performance and many characteristics of infection (Hoffmann et al. 2012; van Heerwaarden et al. 2016; Sgrò et al. 2016; Beaman et al. 2016; Kellermann et al. 2017; Moghadam et al. 2019). In *Drosophila melanogaster*, for example, developmental temperature exposure has been shown to have a greater influence on adult thermal tolerance than direct thermal acclimation (Slotsbo et al. 2016; Kellermann et al. 2017). Thermal acclimation can also impact disease traits across generations. For example, host resistance to infection can be mediated by the thermal environment experienced in the maternal generation (Garbutt et al. 2014). Whilst, for a pathogen, the temperature experienced during one infection cycle can lead to changes in the infectivity of the spores involved in subsequent cycles of infection, analogous to trans-generational effects (Altman et al. 2016; Shocket et al. 2018b). Maternal and developmental acclimation, therefore, has the potential to be an important mechanism for preparing populations to cope with future environmental conditions (Sgrò et al. 2016). However, it is unclear how thermal acclimation prior to infection will influence the impact

of infection on host resistance to thermal stress, and, in addition, affect host and pathogen performance across individual to population level scales.

In this study, we contrasted how thermal acclimation, before and during infection, shapes host thermal tolerance and host and pathogen individual performance, versus the potential for growth of host and pathogen populations. To address these questions, we used the water flea *Daphnia magna* and its bacterial pathogen *Pasteuria ramosa*. *Daphnia* have been shown to be able to mount strong plastic thermal acclimation responses in their upper thermal limits (Williams et al. 2012; Yampolsky et al. 2014; Burton et al. 2020), and temperature is known to mediate their response to infection (Mitchell et al. 2005; Vale et al. 2008; Allen and Little 2011). *Pasteuria ramosa* is a natural bacterial pathogen of *Daphnia*, which has distinct genotypes known to vary in various aspects of within-host performance, including infection rates and spore production (Clerc et al. 2015; Hall and Mideo 2018), both of which have been shown to be sensitive to temperature stress (Vale et al. 2008; Vale and Little 2009; Hector et al. 2019). We used two levels of acclimation, the first being a maternal and developmental acclimation treatment prior to infection, and the second being direct thermal acclimation on focal individuals including over the infection period. These two acclimation levels allowed us to test the separate effects of maternal and developmental acclimation prior to infection, and direct thermal acclimation during infection, on host thermal tolerance alongside other important components of host and pathogen thermal performance.

We first measured thermal tolerance of infected and uninfected individuals as knockdown time under heat shock for each thermal acclimation regime. Next, we measured host lifespan and fecundity for infected and uninfected individuals, as well as within-host pathogen spore loads and infection success for each thermal acclimation treatment. For hosts, we then used this life table data of lifespan and fecundity to calculate population growth rates and death rates under each thermal acclimation treatment to evaluate how temperature exposure may influence host population dynamics (McCallum 2000). For the pathogen, we incorporated estimates of infection success and proliferation into an epidemiological model to estimate a metric for the potential for disease spread through a host population (i.e., Anderson and May 1986), the basic reproduction number ( $R_0$ ), under each thermal acclimation treatment. The ability of a pathogen to persist in a host population is influenced by both host population dynamics and pathogen fitness, and therefore depends on its ability to proliferate within a host, its capacity to spread between hosts, and the supply of new susceptible hosts in a population. Together, these measures allow us to

128 contrast how thermal acclimation can impact various metrics of host and pathogen thermal  
129 performance and fitness at an individual scale, and how they combine to determine the  
130 population scale outcomes.

## 131 **Methods**

### 132 **Host and pathogen**

133 The cyclically parthenogenic crustacean *Daphnia magna* Straus is commonly found in both fresh  
134 and brackish waters, including shallow pools and large lakes, across Eurasia (Ebert 2005). *Pasteuria*  
135 *ramosa* Metchnikoff is a Gram-positive bacterial pathogen of *D. magna* that enters the host during  
136 filter feeding before reducing lifespan and fecundity of its host (Hall and Ebert 2012; Clerc et al.  
137 2015; Ebert et al. 2016). At host death millions of spores are released into the environment where  
138 exclusively horizontal transmission takes place, which itself depends on the interplay between the  
139 pathogen's ability to produce mature transmission spores and its virulence (Hall and Mideo 2018).  
140 In this study we used *Daphnia* genotype BE-OMZ-M10 infected with one of three *P. ramosa*  
141 genotypes (C1, C14 and C20). These pathogen genotypes were chosen because they display a  
142 range of virulence and transmission potentials (Clerc et al. 2015; Hall and Mideo 2018) and also  
143 vary in the extent to which they reduce host thermal tolerances (Hector et al. 2019).  
  
144 Before the experiments, female *Daphnia* taken from stock culture were placed individually in 70-  
145 mL jars filled with 50 mL of Artificial *Daphnia* Medium (ADaM; Ebert et al. 1998) for three  
146 generations to minimise trans-generational effects. *Daphnia* were changed into fresh ADaM twice  
147 a week and fed with algae (*Scenedesmus sp.*) daily. Food levels were increased from one million  
148 cells at birth to eight million by age 14 days to meet the growing energy needs of the animals.  
149 *Daphnia* were maintained under standard conditions (20°C, 16L:8D) and repositioned within the  
150 incubator regularly in order to minimise any positional effects.

### 151 **Experimental animals, thermal acclimation, and infection**

152 Thermal acclimation began in the maternal generation. On the day of birth, F0 (maternal  
153 generation) individuals were taken from clutches 3–5 of the standardised animals and maintained  
154 at either 20°C or 25°C (maternal/developmental temperature treatment, hereafter maternal  
155 acclimation). Experimental F1 animals were then collected from clutches 3–5 of the acclimated  
156 mothers on the day of birth and placed at either 20°C or 25°C (focal acclimation temperature) in a  
157 fully factorial design, resulting in four thermal acclimation treatments (20-20, 20-25, 25-20 & 25-  
158 25°C). The outcome of the thermal acclimation treatments was that the first temperature

experienced would involve maternal and developmental effects (because *Daphnia* develop within the mother and are live born), whilst the second temperature experienced would result in direct thermal acclimation on the focal animals which lasted the whole of their life, including over the infection period. Experimental animals were kept at their acclimation temperatures from birth until either being used in thermal tolerance assays or until death (see below for details).

A total of 1008 females were set up in the experimental generation in a fully factorial design, with 63 individuals per treatment (2 maternal temperatures x 2 focal temperatures x [3 pathogens + uninfected controls]). Individual *Daphnia* were infected with 40,000 *P. ramosa* spores over two days (20,000 per day) starting three days after birth. Infection took place in 70-mL jars filled with 20 mL ADaM for three days, after which all animals were transferred to fresh ADaM and maintained as described above.

### **Thermal tolerance assays**

Static heat shock was used to measure thermal tolerance as heat knockdown time of *Daphnia* from all treatments described above. Individual *Daphnia* were placed in 5-mL glass fly vials covered in mesh and immersed in a constantly agitated water bath filled with ADaM and set to 37°C (Hector et al. 2019). All individuals were monitored constantly throughout the assay and time until knockdown, starting from when they were first placed in the water bath, was recorded when there was no visible movement from the *Daphnia* (Yampolsky et al. 2014; Hector et al. 2019). A total of 36 *Daphnia* per treatment were chosen at random to measure thermal tolerance. Three individuals per treatment could be measured per assay run, so 12 assay runs were conducted over three consecutive days. All animals were between 19 and 21 days post-infection at the time of the assays.

### **Host and pathogen disease traits**

The remaining *Daphnia* that were not used in the thermal tolerance assays were kept at their respective focal acclimation temperatures until death. From birth, all animals were checked daily for deaths, and any dead animals were frozen in 500 µL of RO water for later bacterial spore counting. Twice-weekly all individuals also had their offspring counted. This gave us four important metrics of host and pathogen fitness for each temperature by pathogen treatment combination: host lifespan, host age-specific fecundity, pathogen spore loads at host death, and infection rates.

### **Bacterial spore counts**

Bacterial spore counts were quantified using an Accuri C6 Flow Cytometer (BD Biosciences, San Jose, California). Infected animals were thawed and homogenised in 500 µL of RO water. Then, 10 µL of this sample was pipetted into 190 µL of 5mM EDTA in a 96-well plate. For each run, 6 samples were counted with every fourth well containing only EDTA as a wash step. A combination of gates based on fluorescence (via the 670 LP filter) and side scatter (cell granularity) were used to identify mature spores based on their distinct size, morphology, and fluorescence, compared to immature spores, algae or animal debris. Each sample was counted twice and counts were averaged, and then used to calculate total spore load per infected individual. Samples were also checked under a microscope to determine whether individuals contained mature transmission spores, which would count as a successful infection, or only contained undeveloped spores that would be unable to infect another host and therefore represents an unsuccessful infection.

# **Host population growth and between host disease spread: the model and the parameters**

We investigated how thermal acclimation would impact disease spread through a population using a model. This model tracks changes in the density of susceptible ( $S$ ) and infected ( $I$ ) hosts and environmental pathogen spores ( $Z$ ) (Hall et al. 2009; Civitello et al. 2013)

$$\begin{aligned}\frac{dS}{dt} &= b(S + pI)(1 - c(S + I)) - dS - \beta SZ \\ \frac{dI}{dt} &= \beta SZ - (d + v)I \\ \frac{dZ}{dt} &= \sigma(d + v)I - mZ\end{aligned}$$

where susceptible hosts increase in a density dependent manner, which itself is dependent on a maximum birth rate,  $b$ , and the strength of density dependence,  $c$ . Infection leads to a reduction in fecundity ( $0 \leq p \leq 1$ ). Susceptible hosts die at a constant background rate,  $d$ . Susceptible hosts become infected dependent on an infection rate  $\beta$ , and contact with spores,  $Z$ . Infected hosts die at a constant background rate ( $d$ ) in addition to the virulence of infection ( $v$ ). Spores are released into the environment from dead hosts with a spore load  $\sigma$ , and are lost from the environment (due to degradation) at rate,  $m$ .

From this model we can calculate a metric that informs us about a pathogens potential to spread through an entirely susceptible population, otherwise known as a reproductive ratio,  $R_0$  (Anderson and May 1986). Larger values of  $R_0$  suggest the potential for larger epidemics, which will have greater impacts on host and pathogen populations (Anderson and May 1986). We use  $R_0$  as a qualitative indicator of how our thermal acclimation treatments would impact various between-



219 host processes of host and pathogen populations, and their relative contribution to the potential  
220 for disease spread. From our model above,  $R_0$  is

$$221 \quad R_0 = \left( \frac{b-d}{bc} \right) \left( \frac{\sigma\beta}{m} \right)$$

222 which is dependent on susceptible host density in the absence of disease,  $(b-d)/(bc)$ , and three  
223 epidemiological traits,  $(\sigma\beta/m)$ .  $R_0$  will increase if there are increases in host birth rate,  $b$ , pathogen  
224 transmission rate,  $\beta$ , or pathogen spore loads,  $\sigma$ .  $R_0$  decreases if there are increases in host death  
225 rate,  $d$ , the rate of pathogen loss from the environment,  $m$ , or the strength of density dependence  
226 on host birth rate,  $c$  (Civitello et al. 2013).

## 227 **Model parameterization**

228 To calculate  $R_0$  for each thermal acclimation treatment and pathogen genotype we calculated  
229 various important parameters from the model above using data from animals that we observed  
230 from birth till death. First, we calculated the intrinsic rate of increase (population growth rate –  $r$ )  
231 for each unexposed (susceptible) host individual in each temperature treatment by solving the  
232 Euler-Lotka equation

$$233 \quad 1 = \sum_t e^{-rt} l_t F_t$$

234 where  $l_t$  is the proportion of individuals in a cohort surviving to day  $t$ , and  $F_t$  is the average  
235 fecundity at day  $t$  for each treatment group. Following the methodology of Shocket *et al.* (Shocket  
236 et al. 2018a) we used a simplified version of this equation to calculate the intrinsic rate of increase  
237 for each individual (rather than for each whole population), where for each single individual  $l_t$   
238 always equals 1 while the animals remains alive and  $F_t$  is the fecundity of each individual at day  $t$ ,  
239 yielding the equation

$$240 \quad 1 = \sum_t e^{-rt} F_t.$$

241 We next calculated instantaneous death rate ( $d$ ) for our uninfected (susceptible) hosts in each  
242 temperature treatment assuming time until death followed an exponential distribution, where the  
243 likelihood of a constant death rate ( $d$ ) is calculated from our time until death (lifespan) data under  
244 each temperature treatment (Civitello et al. 2013; Shocket et al. 2018a)

$$245 \quad \ell(d|t_d) = d e^{-dt_d}.$$

Birth rate ( $b$ ) for uninfected (susceptible) hosts was then calculated as the sum of the intrinsic rate of increase ( $r$ ) and death rate ( $d$ ) for uninfected hosts ( $b = r + d$ ) (Civitello et al. 2013; Shocket et al. 2018a).

Transmission rate ( $\beta$ ) was estimated using the numbers of infected and uninfected individuals from each temperature and pathogen treatment using a binomial distribution in a likelihood function to model the number of uninfected hosts in each jar, where the probability of remaining uninfected ( $P$ ) is

$$P = e^{-\beta Zt}$$

where  $Z$  is the density of pathogen spores and  $t$  is the length of the infection period, which allowed us to estimate transmission rate,  $\beta$  (see Shocket et al. 2018a and the supplementary material therein for details of how this likelihood function is derived). In our estimates of transmission rate, individuals were only scored as being infected if they became infected and went on to produce mature transmission spores. Finally, mature spore loads,  $\sigma$ , were quantified for each infected individual as described above.

For all parameters and derived traits we used JAGS (*R2jags* package: Plummer 2003; Su and Yajima 2009) to calculate Bayesian posterior distribution estimates for each trait in turn (as in Shocket et al. 2018a). Two parameters that contribute to our indicator of the potential for disease spread ( $R_0$ ), host populations carrying capacity,  $c$ , and spore degradation rate,  $m$ , were set as constants for all treatments ( $c = 0.01$  and  $m = 0.9$ , taken from Civitello et al. 2013; Shocket et al. 2018a) as they were not measured in this experiment. Whilst it is conceivable that these parameters could vary with temperature exposure, particularly spore degradation ( $m$ ), neither was possible to quantify in these experiments.

Finally, to calculate  $R_0$  for each pathogen and temperature treatment, we incorporated the Bayesian posterior estimates of each of the parameters described above into our derived equation for  $R_0$ . By incorporating the posterior estimates for each calculated trait in turn, we allowed the propagation of error in our estimates of each trait into our final estimates of the potential for disease spread,  $R_0$ .

### Additional statistical analysis

All analyses were conducted in R (v. 3.6.2; R Development Core Team, [www.R-project.com](http://www.R-project.com)).

Figures were produced using *ggplot2* (Wickham 2016) and *cowplot* (Wilke 2019).

276 We investigated the effect of infection and thermal acclimation on heat knockdown times by  
 277 fitting a linear mixed effect model (*nlme* package; Pinheiro et al. 2018). Maternal acclimation  
 278 temperature (2 levels: 20°C or 25°C), focal acclimation temperature (2 levels: 20°C or 25°C), and  
 279 pathogen treatment (4 levels: pathogen genotype C1, C14 and C20, or uninfected controls) and  
 280 their interactions were fitted as fixed effects, while assay run was treated as a random effect. To  
 281 account for heteroscedasticity in the residual variance in this model, residual variance was allowed  
 282 to vary independently at the level of the focal acclimation temperature using the ‘*VarIdent*’  
 283 function (*nlme* package: Pinheiro et al. 2018; but see Zuur et al. 2009). The significance of fixed  
 284 effects were then tested using analysis of variance (ANOVA Type III; *car* package: Fox and  
 285 Weisberg 2018).

286 Next, we investigated how various host and pathogen fitness traits varied by both temperature  
 287 treatment and pathogen exposure. Host lifespan and host total lifetime fecundity were both log  
 288 transformed and then analysed using ANOVA with maternal temperature, focal temperature, and  
 289 pathogen treatment (including all higher order interactions) fit as fixed effects. In these analyses of  
 290 host traits, we included all individuals exposed to a pathogen regardless of whether they  
 291 ultimately lead to infections with mature transmission spores because here we were focussed on  
 292 virulence to the host regardless of whether an infection was successful for the pathogen. To  
 293 analyse within-host pathogen fitness we first predicted the probability that each pathogen  
 294 genotype would infect and go on to produce mature transmission spores by running a binomial  
 295 generalized linear model for each treatment combination. Successful infection probability and  
 296 standard errors were then extracted using the ‘*emmeans*’ function (*emmeans* package: Lenth  
 297 2020). We then analysed within-host spore loads for successful infections (those that produced  
 298 mature transmission spores) using ANOVA with the same fixed effect structure described above.  
 299 Significance of fixed effects were tested for each linear model using Type III ANOVA (white-  
 300 corrected to account for residual heteroscedasticity).

301 For our estimation of disease spread ( $R_0$ ), we used JAGS to produce posterior distributions for each  
 302 contributing trait/parameter (see above). Our standard JAGS settings included 75000 iterations,  
 303 30000 burn-in, thinning of 16, and 3 individual chains. For each trait we used semi-informative  
 304 priors, and set the Bayesian posteriors to follow the appropriate distributions. For the Bayesian  
 305 estimate of transmission rate ( $\beta$ ) and the GLM for infection probability, one treatment achieved a  
 306 100% infection rate in our experiment (pathogen C20, temperature treatment 20°C -20°C), so to  
 307 allow more reasonable point estimates and error to be calculated we adjusted this treatment to

308 include one uninfected individual. Due to differences in early survival, handling errors, and male  
309 individuals set up unintentionally, sample sizes for the different treatment combinations and  
310 disease traits varied between 17 and 26.

## 311 **Results**

### 312 **Disease, acclimation, and thermal tolerance**

313 We first looked at how infection would impact heat knockdown times in combination with both  
314 maternal and focal thermal acclimation. We found that the way in which infection mediated host  
315 thermal tolerance was highly dependent on prior thermal experience (Figure 1), and determined  
316 by a three-way interaction between maternal temperature, focal temperature, and pathogen  
317 treatment (Table 1). The clearest effect was that of focal temperature, where individuals directly  
318 exposed to 25°C showed a clear improvement in knockdown times across all pathogen treatments  
319 compared to individuals exposed to a focal temperature of 20°C (Figure 1). For example, control  
320 individuals exposed to a focal temperature of 25°C saw a two-fold increase in knockdown times  
321 compared to controls acclimated to 20°C. We also found that pathogen exposure reduced thermal  
322 limits compared to controls, but only in the focal 25°C treatments, and that the precise magnitude  
323 and direction of this effect depended on the specific pathogen genotype involved (Figure 1). The  
324 effect of maternal acclimation prior to infection, contributing to the three-way interaction, was  
325 much more subtle, and probably driven by the slight increase in knockdown times for infected  
326 individuals in the 20°C-20°C temperature treatment, as well as variation in the reduction in  
327 knockdown times between pathogen genotypes at 25°C (Figure 1). There was also a notable  
328 increase in the variance in knockdown times across the two focal temperatures, where both  
329 control and infected treatments saw far greater variance after exposure to 25°C focal temperature  
330 (Figure 1).

### 331 **Individual performance: host fitness**

332 Both temperature and pathogen treatments had a significant impact on host lifespan, leading to a  
333 three-way interaction between all treatments (Table 2a; Figure 2a). Exposure to the 25°C focal  
334 temperature reduced lifespan for both control and exposed individuals compared with the 20°C  
335 focal temperature (Figure 2a). However, individuals exposed to a pathogen at 20°C saw a greater  
336 relative decrease in lifespan compared to controls than individuals at 25°C (Figure 2a). This led to  
337 uninfected controls exposed to 25°C having a similar lifespan to infected individuals at 20°C.  
338 Although we found a significant three-way interaction between maternal temperature, focal

339 temperature and pathogen treatment, the effect of maternal temperature was very subtle (Figure  
340 2a).

341 Similarly, the interaction between temperature treatments and pathogen exposure had a  
342 significant effect on host lifetime fecundity (Table 2b; Figure 2b). Control individuals had greatest  
343 fecundity when exposed to a focal 20°C, almost twice the fecundity of control individuals exposed  
344 to 25°C, with the greatest reduction occurring for individuals exposed to both maternal and focal  
345 25°C (Figure 2b). Pathogen exposure severely reduced host lifetime fecundity across pathogen  
346 genotypes and temperature treatments, with the lowest fecundity seen for individuals exposed to  
347 25°C, although this was only marginally lower than pathogen exposed individuals that were reared  
348 at 20°C (Figure 2b). Again the significant contribution of maternal temperature to lifetime  
349 fecundity was small, likely driven by a slight increase for control individuals in the maternal 20°C  
350 treatment compared to maternal 25°C (Figure 2b).

#### 351 **Individual performance: within-host pathogen fitness**

352 We next assessed within-host pathogen fitness as both the probability that a pathogen could  
353 infect a host and produce mature transmission spores, and also the within host mature spore  
354 loads. Successful infection probability was affected by a significant three-way interaction between  
355 temperature treatments and pathogen genotype (Table 2c). Successful infection probability was  
356 overall greatest for individuals reared at a focal 20°C, with a drop in infection rate for all pathogen  
357 genotypes reared at 25°C (Figure 3a). Across maternal temperature treatments, we saw a rank  
358 order shift in pathogen genotypes when individuals were subsequently reared at the focal  
359 temperature 25°C (Figure 3a). Infection success for two pathogen genotypes dropped as low as  
360 25% at the focal temperature 25°C, but the particular genotype involved depended on the  
361 maternal temperature treatment (*i.e.* C20 at 20°C-25°C and C14 at 25°C-25°C; Figure 3a).

362 Mature spore loads were not driven by any interactions between treatments, and instead were  
363 determined by the direct effects of focal temperature and pathogen genotype (Table 2d). Overall  
364 we saw a reduction in mature transmission spores in individuals exposed to a focal 25°C, but  
365 across temperature treatments each pathogen genotype differed but varied reasonably  
366 consistently (Figure 3b), with pathogen genotype C1 generally producing more spores at host  
367 death than C14 and C20, respectively.

#### 368 **Population performance: host population dynamics, pathogen transmission, and disease spread**

Using our disease model, we next parameterised a metric of a pathogen's potential to spread in a susceptible population ( $R_0$ ), and investigated the relative contributions of various parameters of host and pathogen population dynamics to disease spread, and how these various parameters were influenced by thermal acclimation. We found that increasing the focal temperature from 20°C to 25°C considerably increased the birth rates of uninfected (susceptible) hosts by around 15%, with similar effects across maternal acclimation temperatures (Figure 4a). Similarly, host death rates also increased with increasing focal acclimation temperature in uninfected individuals, although to a much smaller magnitude than that of birth rates (Figure 4b). However, the contribution of births and deaths of susceptible hosts to our model of disease spread,  $(b - d)/b$ , rendered the increase in births at 25°C unimportant, and consequently we saw no difference in the contribution to susceptible host population density across any of our thermal acclimation treatments (Figure 4c).

For the epidemiological parameters that were included in our metric of disease spread, pathogen transmission rate was generally higher when hosts were exposed to the focal acclimation temperature of 20°C (Figure 4d), with a reduction in transmission rate at 25°C. We also saw a rank order shift across pathogen genotypes in transmission rate between the two maternal/developmental temperatures when pathogens were subsequently exposed to 25°C (Figure 4d). Our Bayesian posteriors for spore loads (Figure 4e) show the same pattern to our raw data for spore loads (see Figure 3b), where there was an overall decrease in mature spore production at the 25°C focal acclimation temperature, but with similar trends across pathogen genotypes and maternal acclimation temperatures (Figure 4e).

Finally, by combining these parameters, we were able to estimate a metric for the potential of a pathogen genotype to spread in a population ( $R_0$ ). Like most of our traits, the clearest effect was that of the focal acclimation temperature, where we saw a considerable decrease in  $R_0$  at 25°C (Figure 4f). Indeed, for most pathogen genotypes, the potential for disease spread was around an order of magnitude greater at a focal acclimation temperature of 20°C compared to 25°C. This severe reduction in the potential for disease spread at warmer temperatures appears to be driven almost entirely by the effects of temperature on pathogen transmission rate and spore production. We also see a rank order shift in pathogen genotypes across maternal/developmental temperature at the focal acclimation temperature 25°C, which likely represents the effects of maternal acclimation on transmission rate (Figure 4d) influencing the potential of disease spread across maternal acclimation temperatures (Figure 4f).

Tables and figures

Table 1: The effects of maternal acclimation temperature (20°C or 25°C), focal acclimation temperature (20°C or 25°C), pathogen treatment (Control, C1, C14 or C20) and their interactions on heat knockdown times under 37°C static heat shock.

| Trait          | Term                                  | $\chi^2$ | $df$ | $p$ -value        |
|----------------|---------------------------------------|----------|------|-------------------|
| Knockdown time | Maternal temp                         | 0.513    | 1    | 0.474             |
|                | Focal temp                            | 399.944  | 1    | <b>&lt; 0.001</b> |
|                | Pathogen                              | 14.683   | 3    | <b>0.002</b>      |
|                | Maternal temp x focal temp            | 0.005    | 1    | 0.945             |
|                | Maternal temp x pathogen              | 11.090   | 3    | <b>0.011</b>      |
|                | Focal temp x pathogen                 | 32.550   | 3    | <b>&lt; 0.001</b> |
|                | Maternal temp x focal temp x pathogen | 11.465   | 3    | <b>0.009</b>      |

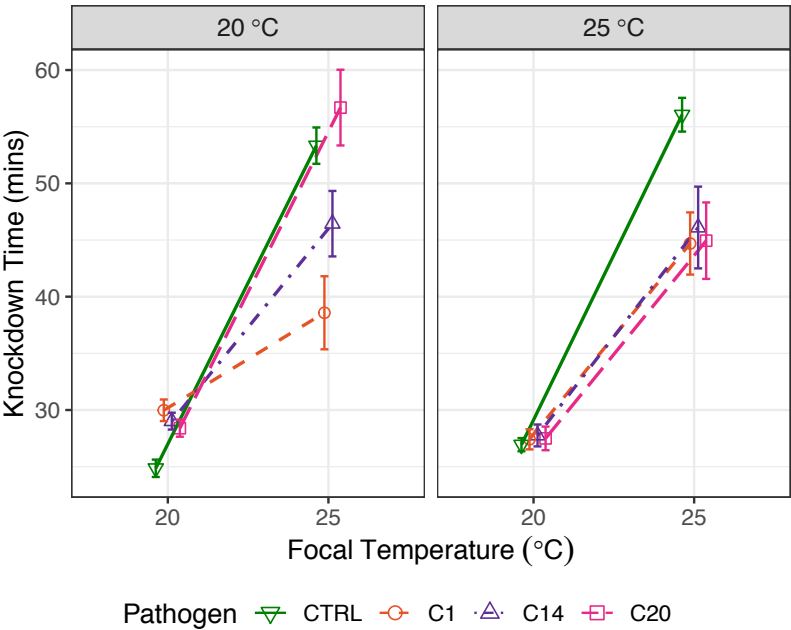

Figure 1: The effect of thermal acclimation on heat knockdown times. Knockdown time was measured for *Daphnia* infected with one of three pathogen genotypes (C1, C14 or C20) or uninfected (CTRL). Each facet represents the maternal/developmental thermal acclimation temperature treatment pre-infection, while the focal temperature was experienced by experimental animals from birth, including over the duration of the infection. Points represent treatment means ( $\pm$  SE).

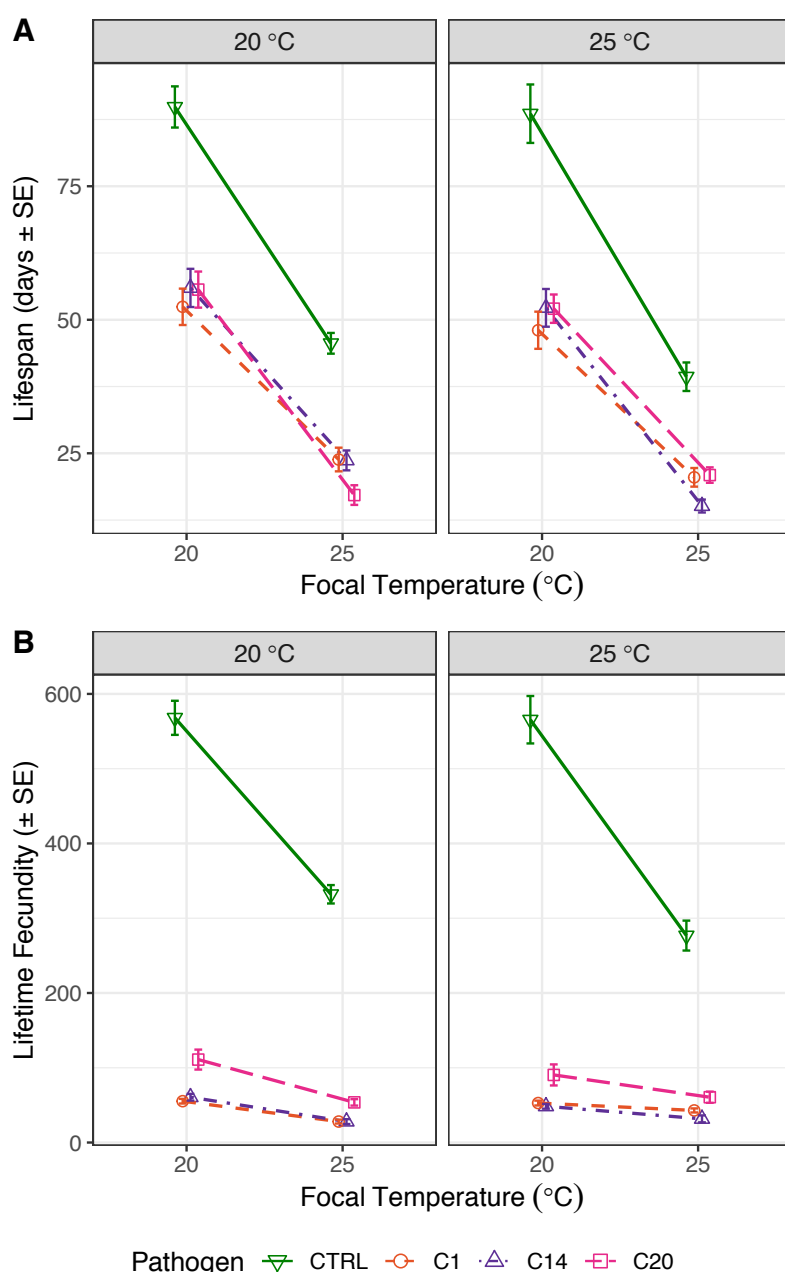

Figure 2: The effect of thermal acclimation on fitness traits of infected and uninfected hosts. A) lifespan, and B) lifetime fecundity, were measured for *Daphnia* infected with one of three pathogen genotypes (C1, C14 or C20) or uninfected (CTRL). Each facet represents the maternal/developmental thermal acclimation temperature treatment pre-infection, while the focal temperature was experienced by experimental animals from birth, including over the duration of the infection. Points represent treatment means ( $\pm$  SE).



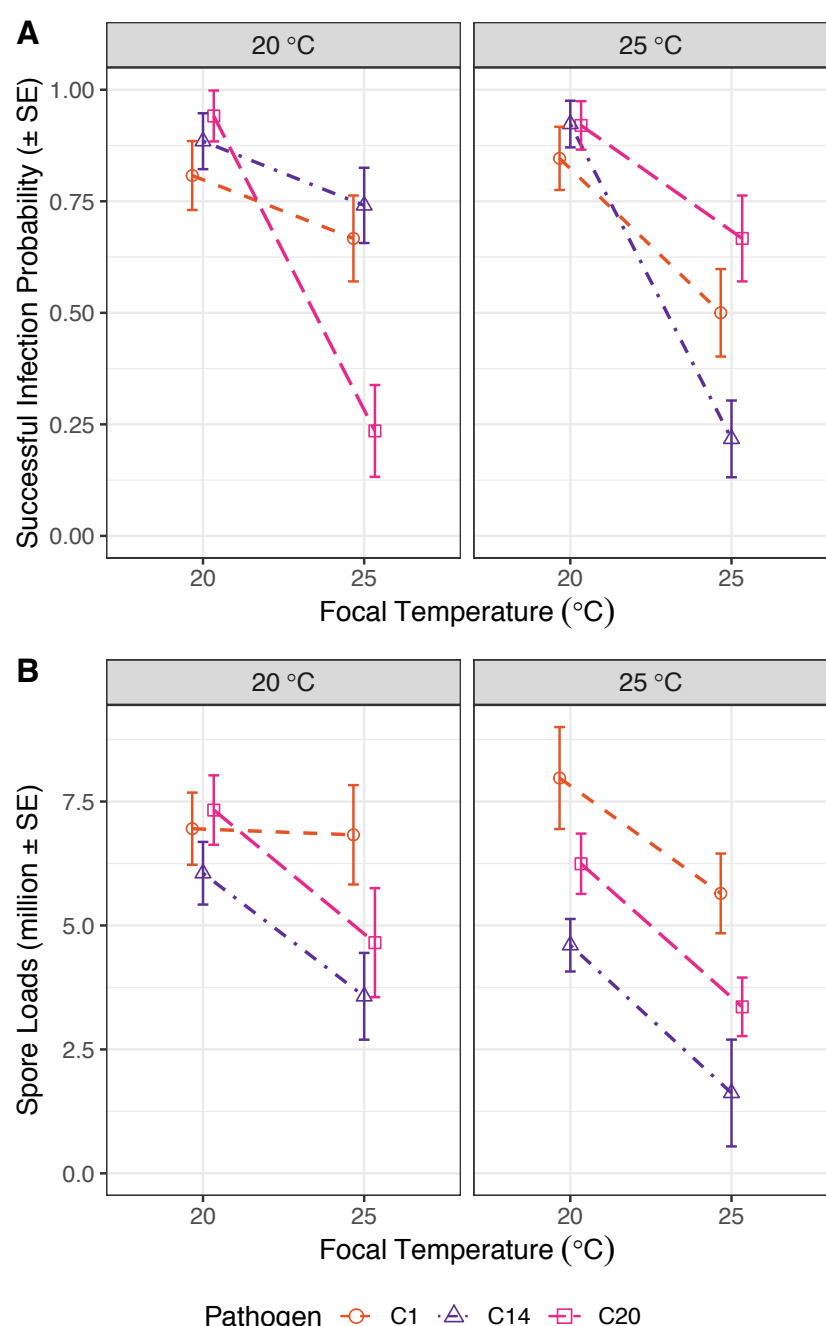

Figure 3: The effect of thermal acclimation on fitness traits of three pathogen genotypes. A) Successful infection probability calculated via a binomial generalized linear model, and B) Within host pathogen spore loads, were measured in hosts infected with one of three pathogen genotypes (C1, C14 or C20). Each facet of the figure represents the maternal and developmental thermal acclimation temperature treatment, while the focal temperature was experienced by experimental animals from birth, including over the duration of the infection. Points represent treatment means ( $\pm$  SE).

431 Table 2: The effects of maternal/developmental temperature (20°C or 25°C), focal temperature  
 432 (20°C or 25°C), pathogen treatment (CTRL, C1, C14 or C20) and all interactions on a) host lifespan,  
 433 b) host lifetime fecundity, c) pathogen infection success probability, and d) within host pathogen  
 434 spore loads.

| Trait                 | Term                                  | <i>F</i> or $\chi^2$ | <i>df</i> | <i>p</i> -value   |
|-----------------------|---------------------------------------|----------------------|-----------|-------------------|
| (a) Host lifespan     | Maternal temp                         | 7.028                | 1         | <b>0.008</b>      |
|                       | Focal temp                            | 605.015              | 1         | <b>&lt; 0.001</b> |
|                       | Pathogen                              | 91.240               | 3         | <b>&lt; 0.001</b> |
|                       | Maternal temp x focal temp            | 0.613                | 1         | 0.434             |
|                       | Maternal temp x pathogen              | 2.956                | 3         | <b>0.032</b>      |
|                       | Focal temp x pathogen                 | 4.837                | 3         | <b>0.003</b>      |
|                       | Maternal temp x focal temp x pathogen | 3.160                | 3         | <b>0.025</b>      |
|                       |                                       |                      |           |                   |
| (b) Host fecundity    | Maternal temp                         | 0.263                | 1         | 0.608             |
|                       | Focal temp                            | 156.177              | 1         | <b>&lt; 0.001</b> |
|                       | Pathogen                              | 729.784              | 3         | <b>&lt; 0.001</b> |
|                       | Maternal temp x focal temp            | 6.324                | 1         | <b>0.012</b>      |
|                       | Maternal temp x pathogen              | 3.590                | 3         | <b>0.014</b>      |
|                       | Focal temp x pathogen                 | 1.241                | 3         | 0.295             |
|                       | Maternal temp x focal temp x pathogen | 4.257                | 3         | <b>0.006</b>      |
|                       |                                       |                      |           |                   |
| (c) Infection success | Maternal temp                         | 0.135                | 1         | 0.714             |
|                       | Focal temp                            | 49.42                | 1         | <b>&lt; 0.001</b> |
|                       | Pathogen                              | 0.292                | 2         | 0.864             |
|                       | Maternal temp x focal temp            | 0.530                | 1         | 0.466             |
|                       | Maternal temp x pathogen              | 3.005                | 2         | 0.223             |
|                       | Focal temp x pathogen                 | 4.573                | 2         | 0.102             |
|                       | Maternal temp x focal temp x pathogen | 7.445                | 2         | <b>0.024</b>      |
|                       |                                       |                      |           |                   |
| (d) Spore loads       | Maternal temp                         | 3.797                | 1         | 0.053             |
|                       | Focal temp                            | 19.539               | 1         | <b>&lt; 0.001</b> |
|                       | Pathogen                              | 10.445               | 2         | <b>&lt; 0.001</b> |
|                       | Maternal temp x focal temp            | 0.913                | 1         | 0.340             |
|                       | Maternal temp x pathogen              | 0.846                | 2         | 0.431             |
|                       | Focal temp x pathogen                 | 0.958                | 2         | 0.386             |
|                       | Maternal temp x focal temp x pathogen | 0.357                | 2         | 0.700             |
|                       |                                       |                      |           |                   |

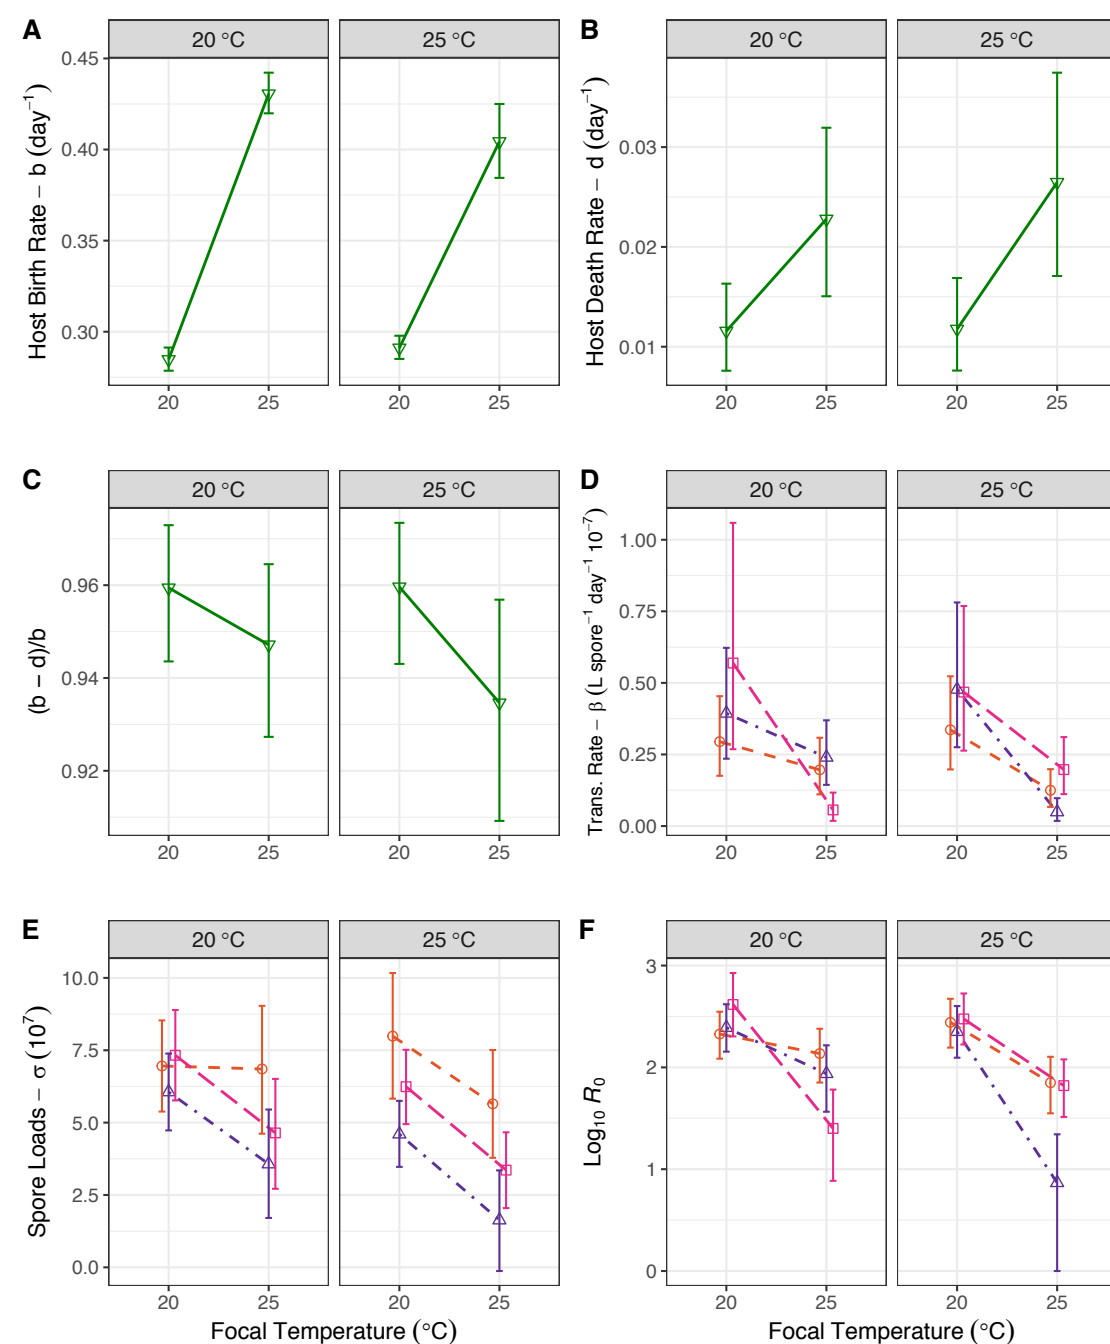

Figure 4: The effect of thermal acclimation on parameters and derived traits from a model of disease spread. A) Birth rate of uninfected hosts ( $b$ ), B) death rates of uninfected hosts ( $d$ ), C) uninfected hosts contribution to disease spread in our model, D) transmission rate ( $\beta$ ) for each pathogen genotype, E) spore loads ( $\sigma$ ) for each pathogen genotype, F) our composite measure of disease spread ( $R_0$ ). Shown are the Bayesian estimated posterior means of each parameter or trait for each treatment (with 95% credible intervals) estimated using JAGS. Our metric of disease spread ( $R_0$ ) is shown on the log10 scale for graphical clarity, and the lower credible interval of pathogen C14 in temperature treatment 25-25 was set to zero (the lowest possible level for this metric) as the raw lower credible interval was negative.

## 445 Discussion

446 With both average temperatures and extreme thermal events increasing with global change, will  
 447 hosts or their pathogens ultimately be the winners or losers? The success of a host or a pathogen  
 448 population depends on processes that occur at the individual level, including host fecundity and  
 449 lifespan, and the ability for a pathogen to reproduce within a host, but also on the balance  
 450 between birth and death rates of a host population and a pathogen's capacity to spread between  
 451 susceptible hosts (Anderson and May 1991; Mideo et al. 2008; Hall and Mideo 2018); processes  
 452 that are properties of the population as a whole. The impact of a pathogen on the thermal limits  
 453 of its host, however, must also be considered. As extreme temperatures are likely to put greater  
 454 pressure upon population than changes in average temperatures (Kingsolver and Woods 2016;  
 455 Sunday et al. 2019), thermal limits, and their modification by infection (Greenspan et al. 2017;  
 456 Hector et al. 2019), will be vital for population persistence (e.g. Bush et al. 2016). Yet, studies that  
 457 integrate changes in thermal limits with an exploration of host and pathogen fitness at both the  
 458 individual and population levels are rare.

459 In this study, we sought to address how temperature exposure can alter host and pathogen  
 460 performance by exploring how different types of thermal acclimation could mediate the individual  
 461 and population level responses of hosts and pathogens to temperature, and comparing this to  
 462 changes in the thermal limits of both uninfected and infected hosts. We focused on thermal  
 463 acclimation that occurs during the previous generation and early development, as well as the  
 464 direct exposure of host and pathogens to warmer temperatures during infection. Our results  
 465 highlight the importance of considering the impact of thermal acclimation on multiple  
 466 components of host and pathogen fitness across both the individual to population level scales.  
 467 Indeed, we find complex and contrasting effects of thermal acclimation on these different  
 468 measures of performance, particularly for hosts. We discuss our findings in regard to host and  
 469 pathogen individual performance, the impact of temperature on pathogen virulence, and the  
 470 population level dynamics of host and pathogens under warmer thermal conditions.

### 471 Thermal acclimation improves thermal tolerances but with a cost to both host and pathogen 472 individual performance

473 Thermal acclimation to warmer temperatures allows individuals to shift their thermal optima or  
 474 maxima, potentially acting as a buffer against future thermal stress (Sinclair et al. 2016; Sgrò et al.  
 475 2016; Rohr et al. 2018). Here, thermal acclimation as a result of direct exposure to warmer  
 476 temperatures substantially increased thermal tolerance of uninfected animals. For example, in

uninfected individuals, thermal acclimation to warmer temperatures increased knockdown times by up to 30 minutes (Figure 1). This increase in knockdown times is far greater than the variation we see in thermal tolerance across large geographic ranges in *Drosophila melanogaster* (Hoffmann et al. 2002; Sgrò et al. 2010; Lasne et al. 2018; Hector et al. 2020), and is similar to latitudinal variation and the effects of thermal acclimation seen in other *Daphnia* populations (Williams et al. 2012; Yampolsky et al. 2014). In addition, a 30 minute increase in knockdown times after acclimation equals the reduction in knockdown times seen in severely infected *Daphnia* raised at their normal culturing temperatures (Hector et al. 2019). Here, even in infected individuals we saw thermal acclimation enhancing host thermal tolerance, but to a lesser extent than uninfected individuals (an average of 15 minutes increase compared to infected individuals at 20°C). Thermal acclimation, therefore, appears to better prepare both infected and uninfected animals for the pressure of extreme thermal events through plastic shifts in their thermal performance.

For both the host and pathogen, however, the improvement in thermal tolerances with acclimation came with a significant cost to other measures of individual performance. Exposure to 25°C led to substantial reductions in the lifespan and lifetime fecundity of both healthy and infected individuals (Figure 2). Simultaneously, at warmer temperatures, within-host pathogen performance was also low. Both the probability of infection success and within-host spore loads substantially dropped at warmer thermal acclimation temperatures. Indeed, for some pathogen genotypes infection success dropped as low as 25% when infections took place at 25°C, suggesting that at 25°C, while pathogen exposure could have severe impacts on host fitness across most individuals (Figure 2), the proportion of infections that successfully led to mature transmission spores could be very low (Figure 3a). This highlights how thermal acclimation can have opposing impacts on thermal stress resistance and other fitness related traits for both hosts and pathogens (e.g. Cavieres et al. 2020).

# **The damage caused by a pathogen is trait-specific and dependent on thermal acclimation**

The decline in host fitness that a pathogen causes, known as virulence, is normally assessed in terms of reductions in lifespan or reproduction (Frank 1996; Day 2002; Alizon et al. 2009; Cressler et al. 2016). However, in the context of global change and extreme thermal events, a pathogen's virulence could equally be extended to include changes in a host's thermal tolerance. At 20°C we observed that infection resulted in a negligible or even slightly beneficial change in knockdown times relative to uninfected controls, but at 25°C individuals experienced up to a 15-minute reduction in thermal limits as a result of infection. In contrast, however, infected individuals at

lower temperatures experienced the greatest virulence in terms of reductions in both lifespan and fecundity relative to uninfected controls. For example, individuals exposed to a pathogen at 20°C experienced a reduction in lifespan of approximately 35 days relative to uninfected individuals, compared to a reduction of around 20 days at 25°C.

By considering the impacts of thermal shifts on the virulence of the pathogen, we see that the damage a pathogen causes its host at warmer temperatures can manifest as a greater reduction in thermal tolerance but a relatively smaller reduction in other, more commonly assessed, fitness traits. These results highlight the complex and contrasting ways in which infection and thermal acclimation can interact to impact various aspects of host performance (Raffel et al. 2013; Manzi et al. 2019; Ferguson and Sinclair 2020). They also highlight a tension between resistance to infection and thermal stress (Hector et al. 2019), such that individuals exposed to 20°C had little to no impact of infection on their thermal tolerance, but overall their thermal tolerance was considerably lower than individuals exposed to 25°C who did nevertheless experience the virulent effect of infection.

### **Contrasting host and pathogen performance across individual and population level scales**

Our results so far suggest that the improved thermal tolerance when exposed to warmer temperatures comes with a substantial burden to the individual performance of both host and pathogens. Yet, as we show, individual performance metrics can be misleading when population persistence instead depends on vital rates such as growth rates for a host population or the between-host spread of a pathogen (Agha et al. 2018; Shocket et al. 2018a). Important for host population growth is the intrinsic rate of increase, a metric for the age specific fecundity of a population, which can itself be partitioned into the relative contributions of intrinsic birth and death rates to population growth (McCallum 2000; Civitello et al. 2013; Shocket et al. 2018a). In contrast, the success of a pathogen population is dependent on its ability to spread through a host population, encompassed by the parameter  $R_0$  (Anderson and May 1986), which depends on both host population dynamics (a combination of birth and death rates) along with key epidemiological traits including pathogen transmission potential and within-host spore proliferation.

The projections of host and pathogen population level performance confirmed how warmer temperatures can accelerate the pace of life for both hosts and pathogens (Angilletta et al. 2004; Fels and Kaltz 2006; Vale et al. 2008; Stoks et al. 2014; Cuco et al. 2018). For the host this led to earlier reproductive output, and higher birth rates as a result (Fig. 4a), but also higher intrinsic death rates (Fig. 4b). The net result however was that these two factors cancel each other out (Fig.

4c). The combination of birth and death rate in our model meant population growth rate of susceptible hosts, ' $(b-d/b)$ ', was equivalent across all both temperatures, as indicated by overlapping credible intervals in Figure 4c. The shift towards earlier reproductive output and a capacity for faster population growth, therefore, appears to completely offset the severe loss of lifetime fecundity and lifespan that each individual experienced at warmer acclimation temperatures.

In contrast, warmer temperatures reduced pathogen success in terms of  $R_0$ , reinforcing the decline in fitness observed for a pathogen within a host. Indeed, the potential for the spread of a pathogen was around an order of magnitude lower at 25°C compared with at 20°C (Fig. 4f). The negligible impact that warmer temperatures had on host vital rates negated any benefit that high birth rates may have provided by enhancing the  $R_0$  value of a pathogen. Instead, the decline in pathogen success at the population scale was driven entirely by the reductions in pathogen transmission rate and spore loads at warmer temperatures. One possibility is that under warm temperatures the pace of life became too fast for a pathogen and the vastly shortened lifespan of a host came at a high cost to the pathogen in terms of the time allowed for proliferation (see Vale et al. 2008; Vale and Little 2009; Clerc et al. 2015; Hall and Mideo 2018; Shocket et al. 2019). Alternatively, warmer temperatures may have afforded a host an improved immune response (Elliot et al. 2002; Adamo and Lovett 2011; Ferguson and Sinclair 2020), constraining within-host proliferation, and pathogen success.

### **Maternal and developmental acclimation had a marginal impact on most measures of host and pathogen performance**

Above we have focussed on the results of direct thermal acclimation, because these were by far the strongest effects. In other species, both maternal temperature effects and the effects of temperature during development are known to influence offspring heat resistance, and other aspects of fitness (discussed in Hoffmann et al. 2012; Beaman et al. 2016). For *Daphnia*, maternal effects have also been found to influence offspring fitness, both in terms of fighting infection and fecundity and lifespan (Mitchell and Read 2005; Hall and Ebert 2012; Garbutt et al. 2014; Michel et al. 2016). These previous results suggest that the combination of maternal and developmental thermal exposure should considerably alter offspring thermal tolerance and fitness, particularly in the face of infection. We found significant effects of maternal temperature across most individual performance traits, although the size of these effects was often small. The effect of maternal temperature was most clear when individuals were subsequently raised at 25°C. For example, the

relative impact of pathogen exposure on host thermal tolerance varied across maternal acclimation treatments (Fig 1). At the broader scale, maternal temperature had little impact on host population dynamics (e.g. Fig 4c), but produced its most noticeable impact on pathogen infection success and in turn  $R_0$ , where the rank order of pathogen genotypes shifted in response to maternal acclimation temperature (Fig. 4f).

These results suggest that the temperature experienced in the parental generation and during early development may have limited impact on overall host performance, where the temperatures experienced directly during life may swamp any carryover effects. This contrasts with what is seen in terrestrial insects such as *Drosophila* where developmental temperatures can be the most important (Kellermann et al. 2017). Maternal acclimation, however, does have a clear effect on which pathogen genotype was most or least successful. As has also been found when altering the temperature over which infection takes place (Fels and Kaltz 2006; Vale et al. 2008; Vale and Little 2009), variable thermal environments, via maternal or developmental effects, have the potential to maintain genetic variation in pathogen populations by altering infection success and, in turn, the capacity for a pathogen genotype to spread within a population (Garbutt et al. 2014). Overall our results suggest that direct thermal acclimation may set the broad changes in host and pathogen fitness, with the influence of maternal effects coming through more nuanced aspects of a host-pathogen interaction such as rank order shifts in pathogen genotype success.

## Conclusion

In summary, studies of thermal ecology, whether looking at host persistence or disease dynamics, often overlook the capacity for thermal acclimation to act across multiple scales. Here we have shown that warmer temperatures, via thermal acclimation, can benefit a host via increases in thermal tolerance, and any simultaneous costs to individual fitness may be outweighed by an increased capacity for population growth. We also suggest that, for a host, the reduction in thermal tolerance caused by infection at warmer temperatures could be considered as an additional aspect of virulence in light of global change. The outlook for a pathogen under warmer temperatures is, however, bleaker. Within-host pathogen success, and ultimately the potential for disease spread, was severely hampered under warmer temperatures through negative effects on pathogen infection success and spore proliferation. If true for other species, hosts may hold an advantage over pathogens in warmer and more variable environments (but see Shocket et al. 2019). However, to fully understand how shifts in temperature will impact hosts and pathogens requires expanding the study of thermal ecology to include host thermal tolerance and host and



605 pathogen thermal performance, whilst also considering how individual level traits relate to  
606 population level performance.

## 607 **Acknowledgements**

608 We would like to thank L. Aulsebrook, I. Booksmythe, L. Heffernan, C. Lasne, S. Layh and J. Lush for  
609 help with laboratory work. This work was supported by funding from both Monash University and  
610 the Australian Research Council.

## 611 **References**

- 612 Adamo, S. A., and M. M. E. Lovett. 2011. Some like it hot: the effects of climate change on  
613 reproduction, immune function and disease resistance in the cricket *Gryllus texensis*. *Journal of*  
614 *Experimental Biology* 214:1997–2004. The Company of Biologists Ltd.
- 615 Agha, R., A. Gross, M. Gerphagnon, T. Rohrlack, and J. Wolinska. 2018. Fitness and eco-  
616 physiological response of a chytrid fungal parasite infecting planktonic cyanobacteria to thermal  
617 and host genotype variation. *Parasitology* 145:1279–1286.
- 618 Alizon, S., A. Hurford, N. Mideo, and M. van Baalen. 2009. Virulence evolution and the trade-off  
619 hypothesis: history, current state of affairs and the future. *Journal of Evolutionary Biology* 22:245–  
620 259.
- 621 Allen, D. E., and T. J. Little. 2011. Dissecting the effect of a heterogeneous environment on the  
622 interaction between host and parasite fitness traits. *Evol Ecol* 25:499–508. Springer Netherlands.
- 623 Altman, K. A., S. H. Paull, P. T. J. Johnson, M. N. Golembieski, J. P. Stephens, B. E. LaFonte, and T. R.  
624 Raffel. 2016. Host and parasite thermal acclimation responses depend on the stage of infection.  
625 *Journal of Animal Ecology* 85:1014–1024.
- 626 Anderson, A. R., and R. M. May. 1991. *Infectious Diseases of Humans: Dynamics and Control*.  
627 Oxford UK Oxford University Press.
- 628 Anderson, R. M., and R. M. May. 1986. The invasion, persistence and spread of infectious diseases  
629 within animal and plant communities. *Philosophical Transactions of the Royal Society of London B:*  
630 *Biological Sciences* 314:533–570.
- 631 Angilletta, M. J. 2009. *Thermal adaptation: a theoretical and empirical synthesis*. Oxford University  
632 Press, Oxford, UK.
- 633 Angilletta, M. J., T. D. Steury, and M. W. Sears. 2004. Temperature, growth rate, and body size in  
634 ectotherms: fitting pieces of a life-history puzzle. *Integr. Comp. Biol.* 44:498–509. Oxford  
635 University Press.
- 636 Beaman, J. E., C. R. White, and F. Seebacher. 2016. Evolution of Plasticity: Mechanistic Link  
637 between Development and Reversible Acclimation. *Trends in Ecology & Evolution* 31:237–249.

638 Burton, T., H.-K. Lakka, and S. Einum. 2020. Acclimation capacity and rate change through life in  
639 the zooplankton *Daphnia*. *Proceedings of the Royal Society of London B: Biological Sciences*  
640 287:20200189.

641 Bush, A., K. Mokany, R. Catullo, A. Hoffmann, V. Kellermann, C. Sgrò, S. McEvey, and S. Ferrier.  
642 2016. Incorporating evolutionary adaptation in species distribution modelling reduces projected  
643 vulnerability to climate change. *Ecol Lett* 19:1468–1478.

644 Cavieres, G., E. L. Rezende, S. Clavijo-Baquet, J. M. Alruiz, C. Rivera Rebella, F. Boher, and F.  
645 Bozinovic. 2020. Rapid within- and transgenerational changes in thermal tolerance and fitness in  
646 variable thermal landscapes. *Ecol Evol* 200:98–9.

647 Chown, S. L., A. A. Hoffmann, T. N. Kristensen, M. J. Angilletta Jr, N. C. Stenseth, and C. Pertoldi.  
648 2010. Adapting to climate change: a perspective from evolutionary physiology. *Clim. Res.* 43:3–15.

649 Civitello, D. J., R. M. Penczykowski, J. L. Hite, M. A. Duffy, and S. R. Hall. 2013. Potassium stimulates  
650 fungal epidemics in *Daphnia* by increasing host and parasite reproduction. *Ecology* 94:380–388.

651 Clerc, M., D. Ebert, and M. D. Hall. 2015. Expression of parasite genetic variation changes over the  
652 course of infection: implications of within-host dynamics for the evolution of virulence.  
653 *Proceedings of the Royal Society of London B: Biological Sciences* 282:20142820.

654 Colinet, H., B. J. Sinclair, P. Vernon, and D. Renault. 2015. Insects in Fluctuating Thermal  
655 Environments. *Annu. Rev. Entomol.* 60:123–140.

656 Cressler, C. E., D. V. McLeod, C. Rozins, J. van den Hoogen, and T. Day. 2016. The adaptive  
657 evolution of virulence: a review of theoretical predictions and empirical tests. *Parasitology*  
658 143:915–930.

659 Cuco, A. P., B. B. Castro, F. Gonçalves, J. Wolinska, and N. Abrantes. 2018. Temperature modulates  
660 the interaction between fungicide pollution and disease: evidence from a *Daphnia*-microparasitic  
661 yeast model. *Parasitology* 145:939–947. Cambridge University Press.

662 Day, T. 2002. On the evolution of virulence and the relationship between various measures of  
663 mortality. *Proceedings of the Royal Society of London B: Biological Sciences* 269:1317–1323.

664 Ebert, D. 2005. Ecology, epidemiology, and evolution of parasitism in *Daphnia*.

665 Ebert, D., C. D. Zschokke-Rohringer, and H. J. Carius. 1998. Within–and between–population  
666 variation for resistance of *Daphnia magna* to the bacterial endoparasite *Pasteuria ramosa*.  
667 *Proceedings of the Royal Society of London B: Biological Sciences* 265:2127–2134.

668 Ebert, D., D. Duneau, M. D. Hall, P. Luijckx, J. P. Andras, L. Du Pasquier, and F. Ben-Ami. 2016. A  
669 Population Biology Perspective on the Stepwise Infection Process of the Bacterial Pathogen  
670 *Pasteuria ramosa* in *Daphnia*. *Adv. Parasitol.* 91:265–310.

671 Elliot, S. L., S. Blanford, and M. B. Thomas. 2002. Host–pathogen interactions in a varying  
672 environment: temperature, behavioural fever and fitness. *Proceedings of the Royal Society of*  
673 *London B: Biological Sciences* 269:1599–1607. The Royal Society.

- 674 Fels, D., and O. Kaltz. 2006. Temperature-dependent transmission and latency of *Holospira*  
675 *undulata*, a micronucleus-specific parasite of the ciliate *Paramecium caudatum*. *Proceedings of the*  
676 *Royal Society of London B: Biological Sciences* 273:1031–1038.
- 677 Ferguson, L. V., and B. J. Sinclair. 2020. Thermal Variability and Plasticity Drive the Outcome of a  
678 Host-Pathogen Interaction. *The American Naturalist* 195:603–615.
- 679 Fox, J., and S. Weisberg. 2018. *An {R} Companion to Applied Regression*. 3rd ed. Sage, Thousand  
680 Oaks CA.
- 681 Frank, S. A. 1996. Models of Parasite Virulence. *Q Rev Biol* 71:37–78. University of Chicago Press.
- 682 Garbutt, J. S., J. A. Scholefield, P. F. Vale, and T. J. Little. 2014. Elevated maternal temperature  
683 enhances offspring disease resistance in *Daphnia magna*. *Funct Ecol* 28:424–431.
- 684 Gehman, A.-L. M., R. J. Hall, and J. E. Byers. 2018. Host and parasite thermal ecology jointly  
685 determine the effect of climate warming on epidemic dynamics. *Proc. Natl. Acad. Sci. U.S.A.*  
686 115:744–749. National Academy of Sciences.
- 687 Greenspan, S. E., D. S. Bower, E. A. Roznik, D. A. Pike, G. Marantelli, R. A. Alford, L. Schwarzkopf,  
688 and B. R. Scheffers. 2017. Infection increases vulnerability to climate change via effects on host  
689 thermal tolerance. *Sci Rep* 7:9349.
- 690 Hall, M. D., and D. Ebert. 2012. Disentangling the influence of parasite genotype, host genotype  
691 and maternal environment on different stages of bacterial infection in *Daphnia magna*.  
692 *Proceedings of the Royal Society of London B: Biological Sciences* 279:3176–3183. The Royal  
693 Society.
- 694 Hall, M. D., and N. Mideo. 2018. Linking sex differences to the evolution of infectious disease life-  
695 histories. *Philos. Trans. R. Soc. Lond., B, Biol. Sci.* 373:20170431.
- 696 Hall, S. R., C. J. Knight, C. R. Becker, M. A. Duffy, A. J. Tessier, and C. E. Cáceres. 2009. Quality  
697 matters: resource quality for hosts and the timing of epidemics. *Ecol Lett* 12:118–128.
- 698 Hector, T. E., C. M. Sgrò, and M. D. Hall. 2019. Pathogen exposure disrupts an organism's ability to  
699 cope with thermal stress. *Global Change Biology* 25:3893–3905.
- 700 Hector, T. E., C. M. Sgrò, and M. D. Hall. 2020. The influence of immune activation on thermal  
701 tolerance along a latitudinal cline. *Journal of Evolutionary Biology* 99:e52613.
- 702 Hoffmann, A. A., A. Anderson, and R. Hallas. 2002. Opposing clines for high and low temperature  
703 resistance in *Drosophila melanogaster*. *Ecol Lett* 5:614–618.
- 704 Hoffmann, A. A., S. L. Chown, and S. Clusella-Trullas. 2012. Upper thermal limits in terrestrial  
705 ectotherms: how constrained are they? *Funct Ecol* 27:934–949.
- 706 Kellermann, V., B. van Heerwaarden, and C. M. Sgrò. 2017. How important is thermal history?  
707 Evidence for lasting effects of developmental temperature on upper thermal limits in *Drosophila*  
708 *melanogaster*. *Proceedings of the Royal Society of London B: Biological Sciences* 284:20170447.
- 709 Kingsolver, J. G., and H. A. Woods. 2016. Beyond Thermal Performance Curves: Modeling Time-  
710 Dependent Effects of Thermal Stress on Ectotherm Growth Rates. *Am. Nat.* 187:283–294.

711 Klockmann, M., F. Günter, and K. Fischer. 2017. Heat resistance throughout ontogeny: body size  
712 constrains thermal tolerance. *Global Change Biology* 23:686–696. Wiley/Blackwell (10.1111).

713 Laine, A. L. 2007. Pathogen fitness components and genotypes differ in their sensitivity to nutrient  
714 and temperature variation in a wild plant–pathogen association. *Journal of Evolutionary Biology*  
715 20:2371–2378. Blackwell Publishing Ltd.

716 Lasne, C., S. B. Hangartner, T. Connallon, and C. M. Sgrò. 2018. Cross-sex genetic correlations and  
717 the evolution of sex-specific local adaptation: Insights from classical trait clines in *Drosophila*  
718 *melanogaster*. *Evolution* 72:1317–1327.

719 Lenth, R. 2020. Estimated Marginal Means, aka Least-Squares Means. R package version 1.4.5.

720 Manzi, F., R. Agha, Y. Lu, F. Ben-Ami, and J. Wolinska. 2019. Temperature and host diet jointly  
721 influence the outcome of infection in a *Daphnia*-fungal parasite system. *Freshwater Biology*  
722 65:757–767.

723 McCallum, H. 2000. Population parameters: estimation for ecological models. Wiley-Blackwell,  
724 Oxford, UK.

725 Michel, J., D. Ebert, and M. D. Hall. 2016. The trans-generational impact of population density  
726 signals on host-parasite interactions. *BMC Evolutionary Biology* 2004 4:1 16:254.

727 Mideo, N., S. Alizon, and T. DAY. 2008. Linking within- and between-host dynamics in the  
728 evolutionary epidemiology of infectious diseases. *Trends in Ecology & Evolution* 23:511–517.

729 Mitchell, S. E., and A. F. Read. 2005. Poor maternal environment enhances offspring disease  
730 resistance in an invertebrate. *Proceedings of the Royal Society of London B: Biological Sciences*  
731 272:2601–2607. The Royal Society.

732 Mitchell, S. E., E. S. Rogers, T. J. Little, and A. F. Read. 2005. Host-parasite and genotype-by-  
733 environment interactions: temperature modifies potential for selection by a sterilizing pathogen.  
734 *Evolution* 59:70–80. Blackwell Publishing Ltd.

735 Moghadam, N. N., T. Ketola, C. Pertoldi, S. Bährndorff, and T. N. Kristensen. 2019. Heat hardening  
736 capacity in *Drosophila melanogaster* is life stage-specific and juveniles show the highest plasticity.  
737 *Biology Letters* 15:20180628.

738 Penczykowski, R. M., A.-L. Laine, and B. Koskella. 2016. Understanding the ecology and evolution  
739 of host–parasite interactions across scales. *Evolutionary Applications* 9:37–52.

740 Pinheiro, J., D. Bates, S. DebRoy, and D. Sarkar. 2018. nlme: Linear and Nonlinear Mixed Effects  
741 Models. R package version 3.1-137. R Foundation for Statistical Computing.

742 Raffel, T. R., J. M. Romansic, N. T. Halstead, T. A. McMahon, M. D. Venesky, and J. R. Rohr. 2013.  
743 Disease and thermal acclimation in a more variable and unpredictable climate. *Nature Climate*  
744 *Change* 3:146–151.

745 Rohr, J. R., D. J. Civitello, J. M. Cohen, E. A. Roznik, B. Sinervo, and A. I. Dell. 2018. The complex  
746 drivers of thermal acclimation and breadth in ectotherms. *Ecol Lett* 21:1425–1439.

747 Sgrò, C. M., J. Overgaard, T. N. Kristensen, K. A. Mitchell, F. E. Cockrell, and A. A. Hoffmann. 2010.  
748 A comprehensive assessment of geographic variation in heat tolerance and hardening capacity in  
749 populations of *Drosophila melanogaster* from eastern Australia. *Journal of Evolutionary Biology*  
750 23:2484–2493.

751 Sgrò, C. M., J. S. Terblanche, and A. A. Hoffmann. 2016. What Can Plasticity Contribute to Insect  
752 Responses to Climate Change? *Annu. Rev. Entomol.* 61:433–451.

753 Shocket, M. S., A. Magnante, M. A. Duffy, C. E. Cáceres, and S. R. Hall. 2019. Can hot temperatures  
754 limit disease transmission? A test of mechanisms in a zooplankton–fungus system. *Funct Ecol*  
755 9:459.

756 Shocket, M. S., A. T. Strauss, J. L. Hite, M. Sljivar, D. J. Civitello, M. A. Duffy, C. E. Cáceres, and S. R.  
757 Hall. 2018a. Temperature Drives Epidemics in a Zooplankton-Fungus Disease System: A Trait-  
758 Driven Approach Points to Transmission via Host Foraging. *The American Naturalist* 191:435–451.

759 Shocket, M. S., D. Vergara, A. J. Sickbert, J. M. Walsman, A. T. Strauss, J. L. Hite, M. A. Duffy, C. E.  
760 Cáceres, and S. R. Hall. 2018b. Parasite rearing and infection temperatures jointly influence  
761 disease transmission and shape seasonality of epidemics. *Ecology* 99:1975–1987.

762 Sinclair, B. J., K. E. Marshall, M. A. Sewell, D. L. Levesque, C. S. Willett, S. Slotsbo, Y. Dong, C. D. G.  
763 Harley, D. J. Marshall, B. S. Helmuth, and R. B. Huey. 2016. Can we predict ectotherm responses to  
764 climate change using thermal performance curves and body temperatures? *Ecol Lett* 19:1372–  
765 1385.

766 Slotsbo, S., M. F. Schou, T. N. Kristensen, V. Loeschcke, and J. G. Sørensen. 2016. Reversibility of  
767 developmental heat and cold plasticity is asymmetric and has long-lasting consequences for adult  
768 thermal tolerance. *J. Exp. Biol.* 219:2726–2732. The Company of Biologists Ltd.

769 Somero, G. N. 2010. The physiology of climate change: how potentials for acclimatization and  
770 genetic adaptation will determine ‘winners’ and ‘losers’. *Journal of Experimental Biology* 213:912–  
771 920. The Company of Biologists Ltd.

772 Stoks, R., A. N. Geerts, and L. De Meester. 2014. Evolutionary and plastic responses of freshwater  
773 invertebrates to climate change: realized patterns and future potential. *Evolutionary Applications*  
774 7:42–55.

775 Sunday, J., J. M. Bennett, P. Calosi, S. Clusella-Trullas, S. Gravel, A. L. Hargreaves, F. P. Leiva, W. C.  
776 E. P. Verberk, M. Á. Olalla-Tárraga, and I. Morales-Castilla. 2019. Thermal tolerance patterns  
777 across latitude and elevation. *Philosophical Transactions of the Royal Society of London B:*  
778 *Biological Sciences* 374:20190036.

779 Vale, P. F., and T. J. Little. 2009. Measuring parasite fitness under genetic and thermal variation.  
780 *Heredity* 103:102–109. Nature Publishing Group.

781 Vale, P. F., M. Stjernman, and T. J. Little. 2008. Temperature-dependent costs of parasitism and  
782 maintenance of polymorphism under genotype-by-environment interactions. *Journal of*  
783 *Evolutionary Biology* 21:1418–1427. Blackwell Publishing Ltd.

784 van Heerwaarden, B., V. Kellermann, and C. M. Sgrò. 2016. Limited scope for plasticity to increase  
785 upper thermal limits. *Funct Ecol* 30:1947–1956. John Wiley & Sons, Ltd (10.1111).

786 Vázquez, D. P., E. Gianoli, W. F. Morris, and F. Bozinovic. 2017. Ecological and evolutionary impacts  
787 of changing climatic variability. *Biological Reviews* 92:22–42. John Wiley & Sons, Ltd.

788 Wickham, H. 2016. *ggplot2*. 2nd ed. Springer-Verlag, New York.

789 Wilke, C. O. 2019. *Cowplot: Streamlined Plot Theme and Plot Annotations for “ggplot2”* [R package  
790 *cowplot* version 1.1.0]. Comprehensive R Archive Network (CRAN).

791 Williams, P. J., K. B. Dick, and L. Y. Yampolsky. 2012. Heat tolerance, temperature acclimation,  
792 acute oxidative damage and canalization of haemoglobin expression in *Daphnia*. *Evol Ecol* 26:591–  
793 609. Springer Netherlands.

794 Wolinska, J., and K. C. King. 2009. Environment can alter selection in host–parasite interactions.  
795 *Trends in Parasitology* 25:236–244.

796 Yampolsky, L. Y., T. M. M. Schaer, and D. Ebert. 2014. Adaptive phenotypic plasticity and local  
797 adaptation for temperature tolerance in freshwater zooplankton. *Proceedings of the Royal Society*  
798 *of London B: Biological Sciences* 281:20132744. The Royal Society.

799 Zuur, A. F., E. N. Ieno, N. Walker, A. A. Saveliev, and G. M. Smith. 2009. *Mixed effects models and*  
800 *extensions in ecology with R*. Springer New York, New York, NY.

801 Zwaan, B. J., R. Bijlsma, and R. F. Hoekstra. 1992. On the developmental theory of ageing. II. The  
802 effect of developmental temperature on longevity in relation to adult body size in *D.*  
803 *melanogaster*. *Heredity* 68:123–130. Nature Publishing Group.

804
